# Supplementary material for: Synthesis and modification of monodisperse silica microspheres for UPLC separation of C60 and C70
Source: Royal Society of Chemistry journal article supplement (doi:10.1039/c5ay02655e), 2015-12-17
Supplement: c5ay02655e1.pdf [file c5ay02655e1.pdf]

Table S1 Effects of TEOS amount on the size of silica particles

| No. | T    | V <sub>ammonia</sub> | W <sub>TEOS</sub> | v        | Diameter | PDI  |
|-----|------|----------------------|-------------------|----------|----------|------|
|     | (°C) | (mL)                 | (g)               | (mL/min) | (μm)     | (%)  |
| 01  | 30   | 9.00                 | 2.00              | 0.20     | 1.20     | 2.36 |
| 02  | 30   | 9.00                 | 3.95              | 0.20     | 1.75     | 3.77 |
| 03  | 30   | 9.00                 | 6.00              | 0.20     | 2.01     | 4.86 |

Table S2 Effects of ammonia concentration on the size of silica particles

| No. | T    | V <sub>ammonia</sub> | W <sub>TEOS</sub> | v        | Diameter | PDI  |
|-----|------|----------------------|-------------------|----------|----------|------|
|     | (°C) | (mL)                 | (g)               | (mL/min) | (μm)     | (%)  |
| 04  | 30   | 6.00                 | 3.95              | 0.20     | 2.00     | 4.63 |
| 05  | 30   | 7.00                 | 3.95              | 0.20     | 1.84     | 3.52 |
| 06  | 30   | 9.00                 | 3.95              | 0.20     | 1.52     | 3.21 |

Table S3 Effects of temperature on the size of silica particles

| No. | T    | V <sub>ammonia</sub> | W <sub>TEOS</sub> | v        | Diameter | PDI  |
|-----|------|----------------------|-------------------|----------|----------|------|
|     | (°C) | (mL)                 | (g)               | (mL/min) | (μm)     | (%)  |
| 07  | 15   | 9.00                 | 3.95              | 0.20     | 1.39     | 2.98 |
| 08  | 30   | 9.00                 | 3.95              | 0.20     | 1.60     | 4.13 |
| 09  | 50   | 9.00                 | 3.95              | 0.20     | 2.04     | 4.98 |

Table S4 Effects of addition rate on the size of silica particles

| No. | T<br>(°C) | V <sub>ammonia</sub><br>(mL) | W <sub>TEOS</sub><br>(g) | v<br>(mL/min) | Diameter<br>(μm) | PDI<br>(%) |
|-----|-----------|------------------------------|--------------------------|---------------|------------------|------------|
| 10  | 30        | 9.00                         | 3.95                     | 0.10          | 2.01             | 4.10       |
| 11  | 30        | 9.00                         | 3.95                     | 0.20          | 1.48             | 3.25       |
| 12  | 30        | 9.00                         | 3.95                     | 0.40          | 1.30             | 3.67       |
